# Supplementary material for: High performance low temperature carbon composite catalysts for flexible dye sensitized solar cells
Source: Royal Society of Chemistry journal article supplement (doi:10.1039/c3cp52982g), 2013-01-01
Supplement: c3cp52982g.pdf [file c3cp52982g.pdf]

## Supporting Information [Ref 19]

### Bending test

Figure S1 shows the qualitative behavior of the test CE samples when bended to a semicircular geometry. The bending typically lasted for 20 seconds.

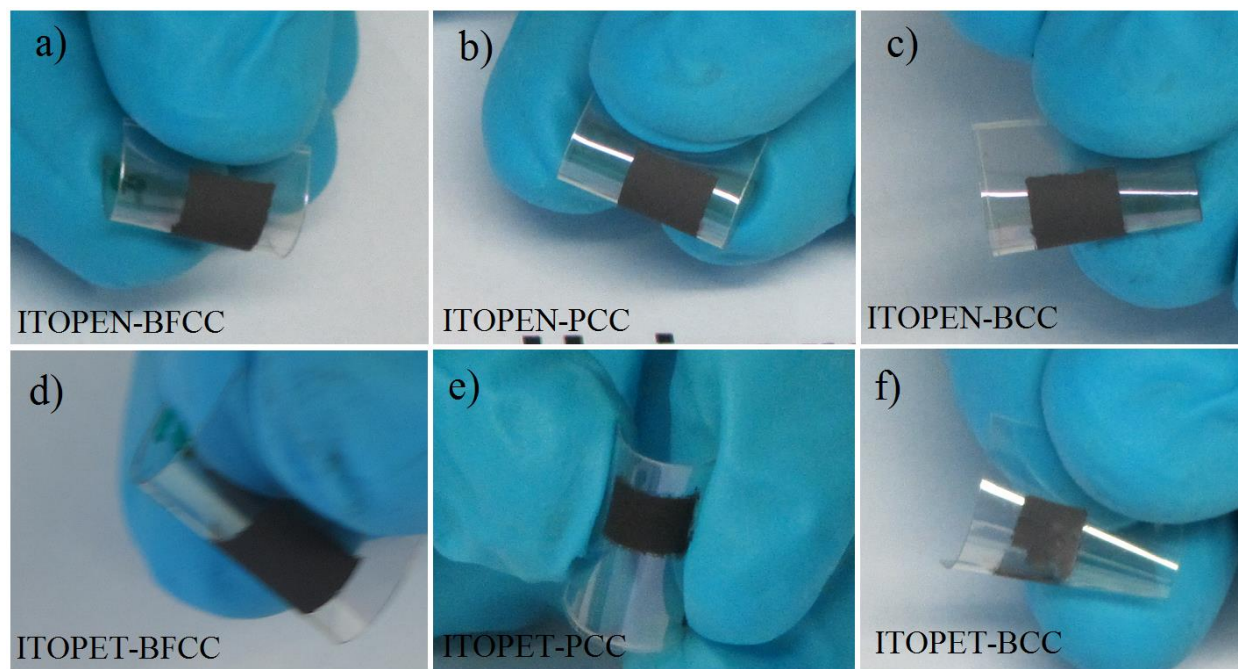

**Figure S1:** Bending test of carbon composites deposited on ITO-PEN and ITO-PET sheets

### Description of Tape Adhesion Test

For the adhesion test the basic idea was adapted from the standardized tape tests <sup>1, 2</sup>. Carbon composites catalyst layers were first deposited on FTO-Glass, ITO-PEN and ITO-PET substrates by the doctor blading method. After that a stripe of adhesive tape (3M Scotch, Removable 811, 19 mm x 32.9 mm) was applied on each deposited layer and rolled with a heavy (650 g) round metallic disk (diameter = 70 mm) for four times to ensure the good adhesion of the tape with the catalyst layer. After that the tape was then pulled off from the substrate at 90° angle (Figure S2).

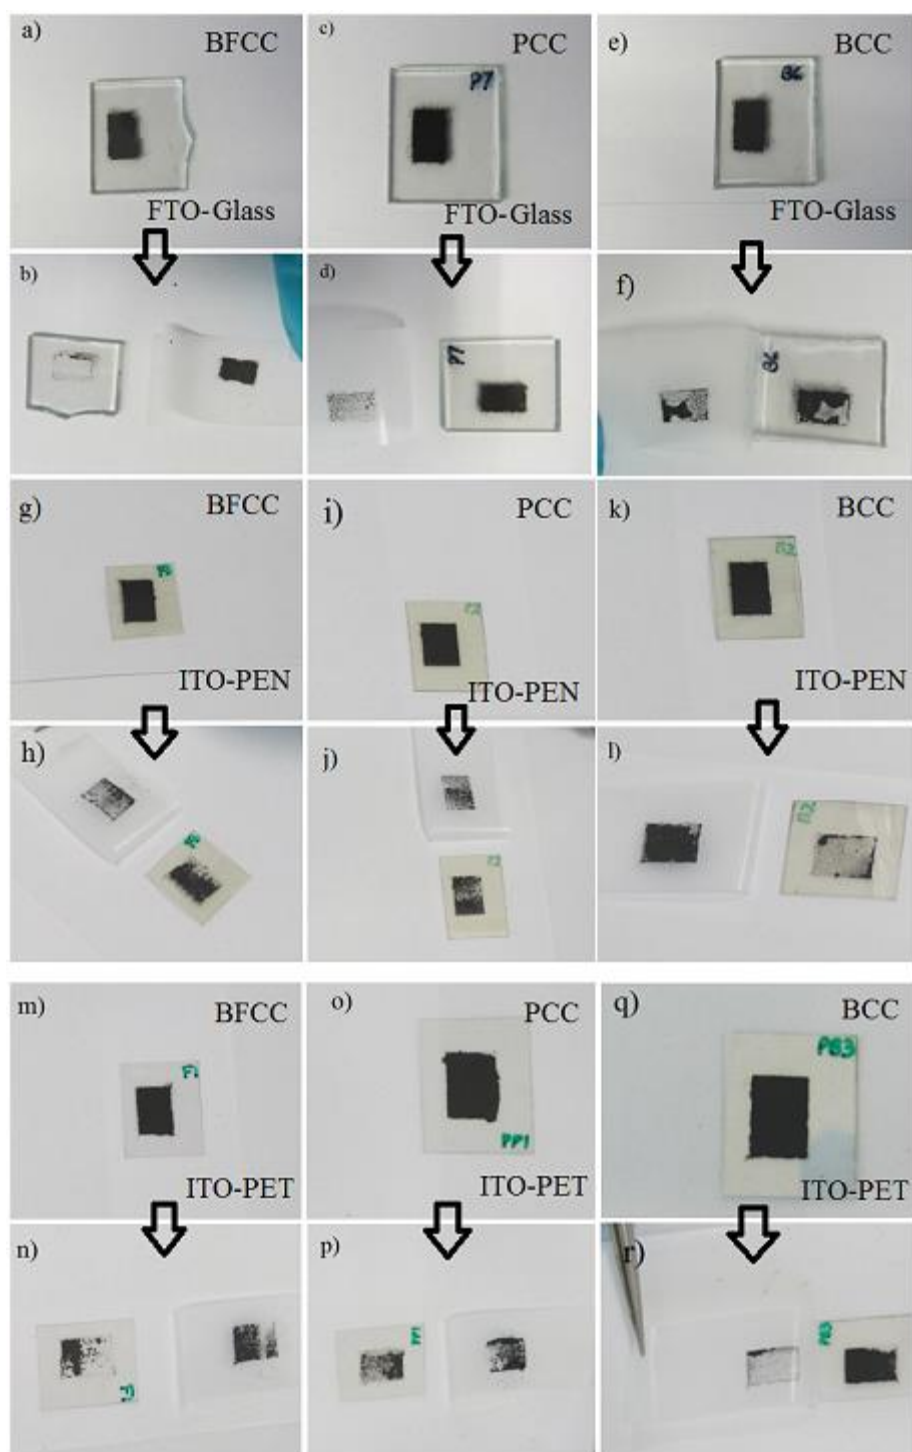

**Figure S2:** Tape adhesion test of carbon composites on FTO-Glass, ITO-PEN and ITO-PET sheets.

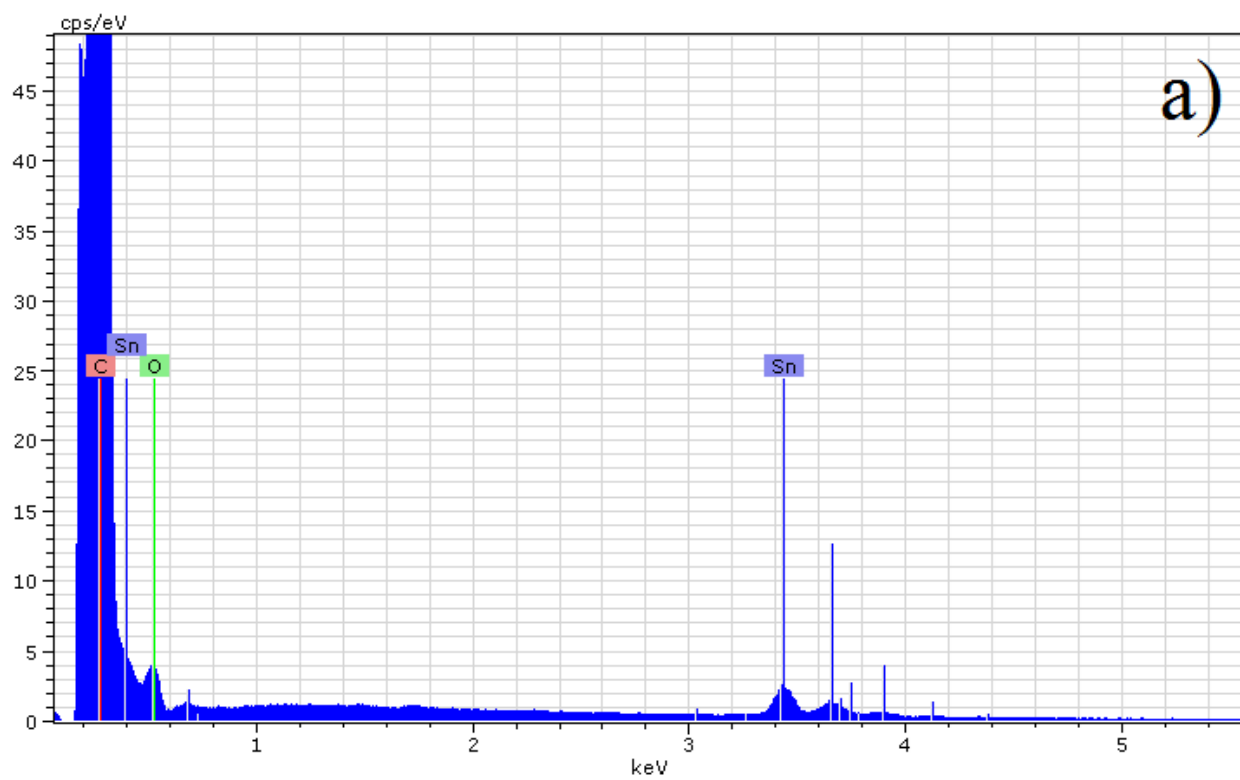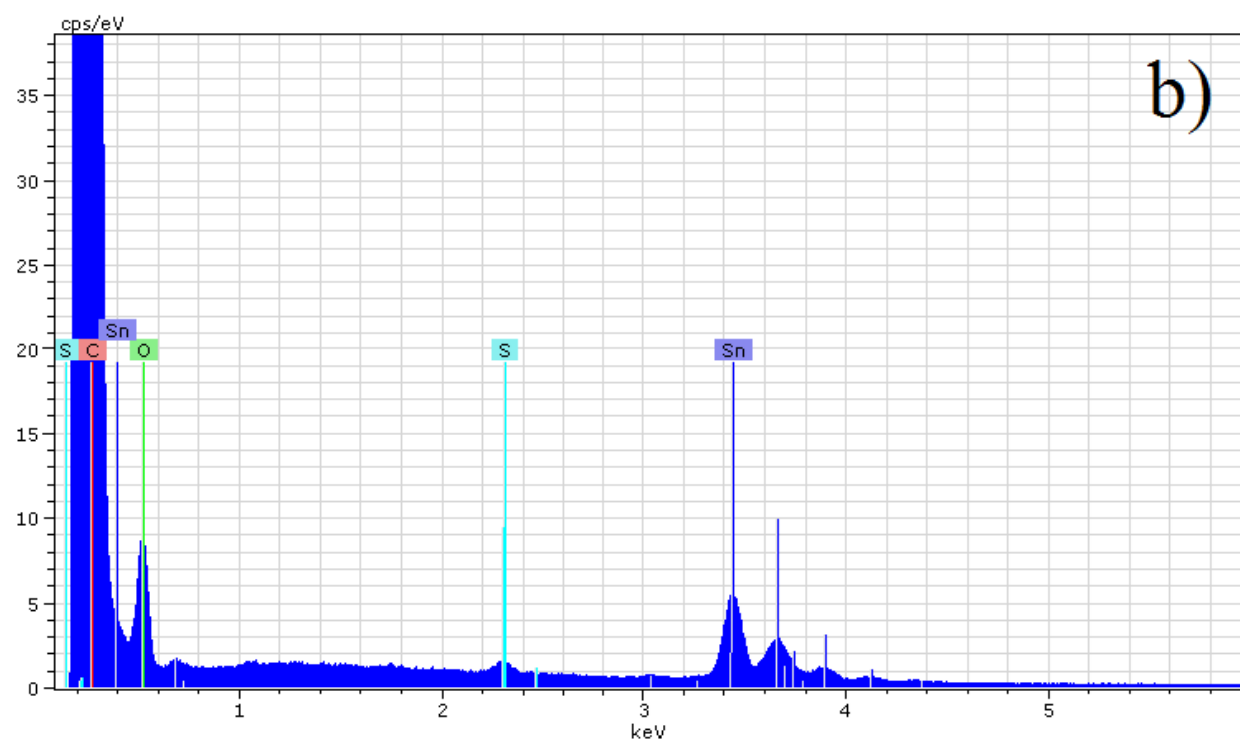

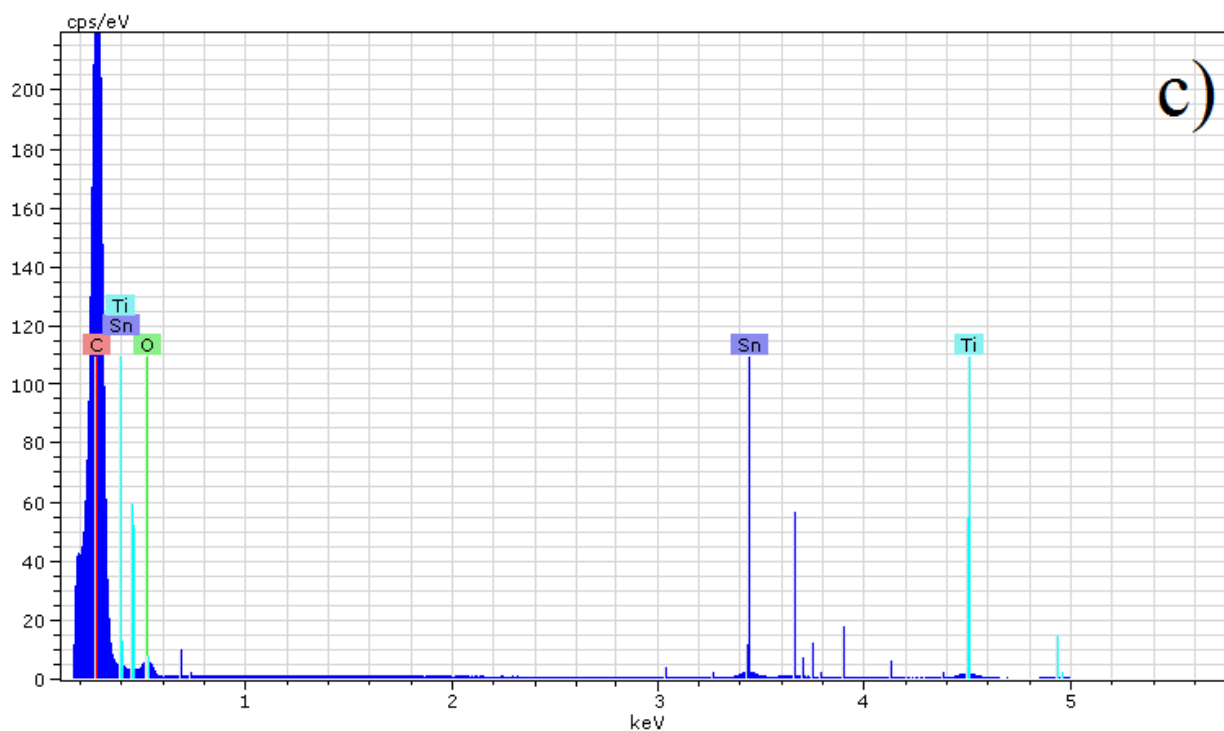

**Figure S3:** EDS spectra of a) Binder Free carbon composite (BFCC) b) PEDOT Carbon Composite (PCC) c) Binder enriched carbon composite (BCC).

### EDS analysis

The EDS spectra confirms the presence of different materials in the different carbon composites as follows:

Binder Free carbon composite (BFCC) (Figure S3 a): SnO<sub>2</sub> (Sn and O peaks) and carbon (from graphite and furnace black).

PEDOT Carbon Composite (PCC) (Figure S3 b): Same materials as in BFCC, but added PEDOT that gives rise to the additional sulfur peak (S).

Binder enriched carbon composite (BCC) (Figure S3 c): Same materials as in BFCC, but added TiO<sub>2</sub> that gives rise to the additional Ti peak.

### **References**

[1] <http://www.ipc.org/TM/2.4.1E.pdf>

[2] <http://www.pstc.org/files/public/101.pdf>
